# Supplementary material for: Assessing Adherence to International Meningitis treatment guidelines in United Arab Emirates healthcare settings: A retrospective study
Source: Research Square preprint supplement (doi:10.21203/rs.3.rs-7003864/v1), 2025-07-28
Supplement: Supplementary file 1 [file da0d4a9b8864b77f8023862d.docx]

**Data collection form**

1. Patient’s Demographics:

- Admission date: ________
- Age: ______
- Gender: Male Female
- Weight: ________kg, Height: _____cm, Percentile, ______BMI: __________kg/m2 BSA __________ m2
- CrCl: ml/min
- Allergy (s): Yes No If yes, specify: _________
- Delivery: NVD C-Section
- Preterm Baby: Yes No
- Recent travel: Yes No undetermined
- Vaccination:
- -Meningococcal Yes No.
- -Pneumococcal Yes No
- -Haemophilus influenza type b Yes No

1. Past medical history:

- Neurosurgery: Yes No
- Head trauma: Yes No
- Diabetes: Yes No
- Chronic renal failure: Yes No
- Chronic liver failure: Yes No
- AKI : Yes No
- Sepsis : Yes No
- COPD: Yes No
- Pneumonia: Yes No
- Cancer Yes No
- Recent exposure to someone with meningitis: Yes No
- A recent or current sinusitis or otitis media: Yes No
- Others:

Intake of any medications:

- TNF-alpha inhibitors: Yes No
- Other immunosuppressant: Yes No
- NSAIDS (last month): Yes No
- TMP-SMX: Yes No
- IV Immunoglobulin: Yes No
- Corticosteroids: Yes No
- Antibiotics in the last 3 months: Yes No

1. Present medical diagnosis:

- Penetrating trauma: Yes No
- Post neurosurgery: Yes No
- CSF shunt: Yes No
- Immunocompromised Patient(non-HIV): Yes No
- Seizure: Yes No
- Papilledema: Yes No
- High Intracranial Pressure: Yes No
- Cancer: Yes No
- After Transplantation: Yes No

D. Risk factors for meningitis: (If available)

Living in crowded accommodation: Yes No

Pregnancy: Yes No

Splenectomy Yes No

E. Meningitis etiology:

- Streptococcus pneumonia: Yes No
- Streptococcus agalactiae: Yes No
- Neisseria meningitides: Yes No
- Hemophilus influenza: Yes No
- Listeria monocytogenes: Yes No
- Escherichia coli: Yes No
- Other Enterobacteriaceae Yes No
- Staphylococcus aureus: Yes No
- Staphylococcus epidermis Yes No
- Pseudomonas aeruginosa Yes No
- Enterococcus species Yes No
- No growth Yes No

Lumbar Puncture:

Lumbar puncture was done immediately after suspicion of bacterial meningitis:

Yes No

Appropriate Not Appropriate

Empirical Antibiotics was administered before Lumbar puncture:

Yes No

Appropriate Not Appropriate

Dexamethasone was administered before the lumbar puncture.

Yes No

Appropriate Not Appropriate

Lumbar Puncture was repeated:

Yes No

Appropriate Not Appropriate

L. Blood Culture

Blood culture obtained after suspicion of meningitis.

Yes No

Appropriate Not Appropriate

Blood culture obtained before Antibiotics:

Yes No

Appropriate Not Appropriate

N. CT Scan

CT Scan is indicated: Yes No

If Yes: CT Scan is performed after blood culture and empiric treatment:

Yes No

Appropriate Not Appropriat

F. Regimen given:

- Ampicillin + Cefotaxime
- Ampicillin + Aminoglycoside
- Penicillin + Aminoglycoside
- Vancomycin + Ceftriaxone
- Vancomycin + Cefotaxime
- Vancomycin + Ampicillin + Cefotaxime
- Vancomycin + Ampicillin + Ceftriaxone
- Vancomycin + Ampicillin + Cefotaxime+Rifampin
- Vancomycin + Ampicillin + Cefotaxime+Rifampin
- Vancomycin + Cefepime
- Vancomycin + Ceftazidime
- Vancomycin + Meropenem
- Acyclovir
- Ceftriaxone
- Cefotaxime
- Ampicillin
- Penicillin G
- Meropenem
- Gatifloxacin
- Moxifloxacin
- Aztreonam
- Trimethoprim-Sulphamethoxazole
- Chloramphenicol
- Cefepime

**Supplementary or raw data**

Table 8

Empiric regimen given:

| Regimen | Number (%) |
| --- | --- |
|  |  |
| Ampicillin+Cefotaxime | 7 (4.3%) |
| Ampicillin+Aminoglycoside | 3 (1.9%) |
| Penicillin+Aminoglycoside | 5 (3.1%) |
| Vancomycin+Ceftriaxone | 83 (51.6%) |
| Vancomycin+Cefotaxime | 8 (5%) |
| Vancomycin+Ceftriaxone+Ampicillin | 1 (0.6%) |
| Vancomycin+Cefotaxime+Ampicillin | 4 (2.5%) |
| Vancomycin+Ceftriaxone+Ampicillin+Rifampin | 4 (2.5%) |
| Vancomycin+Cefotaxime+Ampicillin+Rifampin | 4 (2.5%) |
| Vancomycin+Ceftazidime | 4 (2.5%) |
| Vancomycin+Cefepime | 1 (0.6%) |
| Vancomycin+Meropenem | 9 (5.6%) |
| Vancomycin+Amikacin | 1 (0.6%) |
| Acyclovir | 39 (24.2%) |
| Ceftriaxone | 17 (10.6%) |
| Ampicillin | 4 (2.5%) |
| Meropenem | 6 (3.7%) |
| Penicillin G | 4 (2.5%) |
| Moxifloxacin | 4 (2.5%) |
| Aztreonam | 4 (2.5%) |
| TMP-SMX | 4 (2.5%) |
| Chloramphenicol | 4 (2.5%) |
| Cefepime | 4 (2.5%) |
| Cefotaxime | 11 (6.8%) |
| Vancomycin | 2 (1.2%) |
| Gentamicin | 4 (2.5%) |
| Metronidazole | 1 (0.6%) |
| Ceftazidime | 1 (0.6%) |
| Amikacin | 2 (1.2%) |
| Rifampin | 2 (1.2%) |
| Cefotaxime+Penicillin | 4 (2.5%) |
| Linezolid | 2 (1.2%) |
| Vancomycin+Aminoglycoside | 1 (0.6%) |
| Clindamycin | 1 (0.6%) |
| Piperacillin+Tazobactam | 1 (0.6%) |
| Teicoplanin | 2 (1.2%) |
| Gentamicin | 4 (2.5%) |

| Length of hospital stay(days) | Blood Culture | | | CT-Scan | | | Empiric therapy | | | Definitive therapy | | | Steroids | | | Lumbar Puncture | | |
| --- | --- | --- | --- | --- | --- | --- | --- | --- | --- | --- | --- | --- | --- | --- | --- | --- | --- | --- |
| Not Appr. | Appr. | Total | Not Appr. | Appr. | Total | Not Appr. | Appr. | Total | Not Appr | Appr | Total | Not Appr | Appr | Total | Not Appr | Appr | Total |
| 0-10 | 26 | 39 | 65 | 24 | 46 | 70 | 50 | 19 | 69 | 11 | 4 | 15 | 55 | 15 | 70 | 52 | 16 | 68 |
| 11-20 | 15 | 36 | 51 | 24 | 29 | 53 | 34 | 17 | 51 | 18 | 7 | 25 | 38 | 15 | 53 | 41 | 12 | 53 |
| 21-30 | 3 | 13 | 16 | 9 | 8 | 17 | 10 | 6 | 16 | 5 | 5 | 10 | 12 | 5 | 17 | 10 | 7 | 17 |
| 31-40 | 3 | 2 | 5 | 1 | 4 | 5 | 1 | - | 1 | 2 | 1 | 3 | 3 | 2 | 5 | 1 | 4 | 5 |
| 41-50 | - | 2 | 2 | 1 | 3 | 4 | 3 | 1 | 4 | - | - | - | - | 2 | 2 | 1 | 3 | 4 |
| 51-60 | - | 2 | 2 | 1 | 2 | 3 | 2 | 1 | 3 | 1 | 1 | 2 | 2 | 1 | 3 | 2 |  | 2 |
| 61-70 | 1 | 21 | 3 | - | 3 | 3 | 2 | 1 | 3 | 2 | 1 | 3 | 1 | 2 | 3 | 1 | 2 | 3 |
| 71-80 | - | 3 | 1 | - | 1 | 1 | 1 |  | 1 | 1 |  | 1 | 1 |  | 1 | - | 1 | 1 |
| 81-90 | - | 1 | 3 | - | 3 | 3 | 1 | 1 | 2 | 1 | 2 | 3 | 1 | 2 | 3 | 2 | 1 | 3 |
| 111-120 | 1 | 1 | 2 | - | 2 | 2 | 1 | - | 1 | 1 | 1 | 2 | 1 | 1 | 2 | 1 | 1 | 2 |
| 141-150 | - | 1 | 1 | 1 |  | 1 | - | - | - | 1 | - | 1 | - | 1 | 1 | - | 1 | 1 |
| 171-180 | 1 | 1 | 2 | 1 | 1 | 2 | 2 | - | 2 |  | 1 | 1 | - | 2 | 2 | 2 | 2 | 4 |

Table 9 (the distribution of length of hospital stay with interventions appropriateness)

Table 10: all pathogens identified in culture results

| **Isolated Pathogens** | **Numbers** | **Percentages** |
| --- | --- | --- |
| Streptococcus Pneumonia | 10 | 5.71% |
| Streptococcus agalactiae | 1 | 0.57% |
| Neisseria meningitides | 3 | 1.71% |
| Hemophilus influenza | 3 | 1.71% |
| Listeria monocytogenes | 3 | 1.71% |
| E.coli | 3 | 1.71% |
| Enterobacteriaceae | 4 | 2.29% |
| S.aureus | 6 | 3.43% |
| S.epidermis | 6 | 3.43% |
| P.aeruginosa | 3 | 1.71% |
| Enterococcus species | 3 | 1.71% |
| Staphylococcus Capitis | 1 | 0.57% |
| Proteus Marbilis | 2 | 1.14% |
| Bacteriodes Ovatus | 1 | 0.57% |
| Pseudomonas Stutzeri | 1 | 0.57% |
| Streptococcus mitis | 1 | 0.57% |
| Gram positive cocci | 1 | 0.57% |
| Citrobacter koseri | 1 | 0.57% |
| Sparce Moraxella | 1 | 0.57% |
| Elizabethkingia meningoseptica | 1 | 0.57% |
| K.pneumonia | 5 | 2.86% |
| Staphylococcus hominis | 4 | 2.29% |
| Seratia marcescens | 1 | 0.57% |
| Mirococcus species | 1 | 0.57% |
| Acinobacter Baumani | 3 | 1.71% |
| No Growth | 106 | 60.57% |
